# Supplementary material for: A highly transparent self-cleaning superhydrophobic surface by organosilane-coated alumina particles deposited via electrospraying
Source: Royal Society of Chemistry journal article supplement (doi:10.1039/c5ta02226f), 2015-01-01
Supplement: c5ta02226f1.pdf [file c5ta02226f1.pdf]

## **Supporting Information**

# **Highly Transparent Self-Cleaning Superhydrophobic Surface by Organosilane-coated Alumina Particles Deposited via Electrospraying**

Hyun Yoon<sup>1,†</sup>, Hayong Kim<sup>1,†</sup>, Sanjay S. Latthe<sup>2</sup>, Min-woo Kim<sup>1,3</sup>, Salem Al-Deyab<sup>4</sup>,

Sam S. Yoon<sup>1,\*</sup>

<sup>1</sup>School of Mechanical Engineering, Korea University, Seoul 136-713, Korea

<sup>2</sup>Photocatalysis Int. Research Center, Tokyo University of Science, Noda, Chiba 278-8510, Japan

<sup>3</sup>Green School, Korea University, Seoul, 136-713, Republic of Korea

<sup>4</sup>Petrochem. Research Chair, Dept. of Chem., King Saud Univ., Riyadh 11451, Saudi Arabia

\*Corresponding author: [skyoona@korea.ac.kr](mailto:skyoona@korea.ac.kr)

†These authors contributed equally.

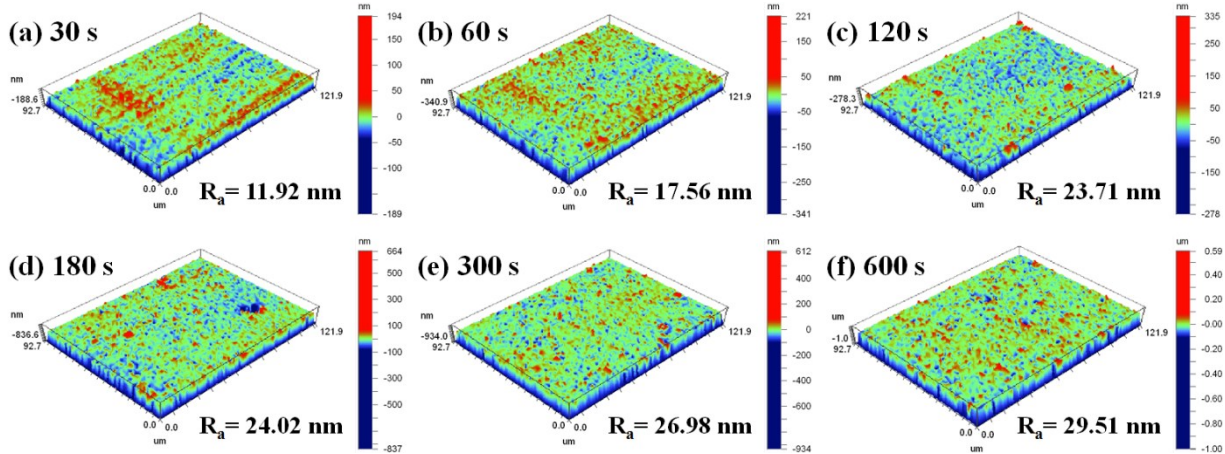

**Figure S1. The optical 3D profiler measurement of the silica-alumina thin films coated at various spraying times.**

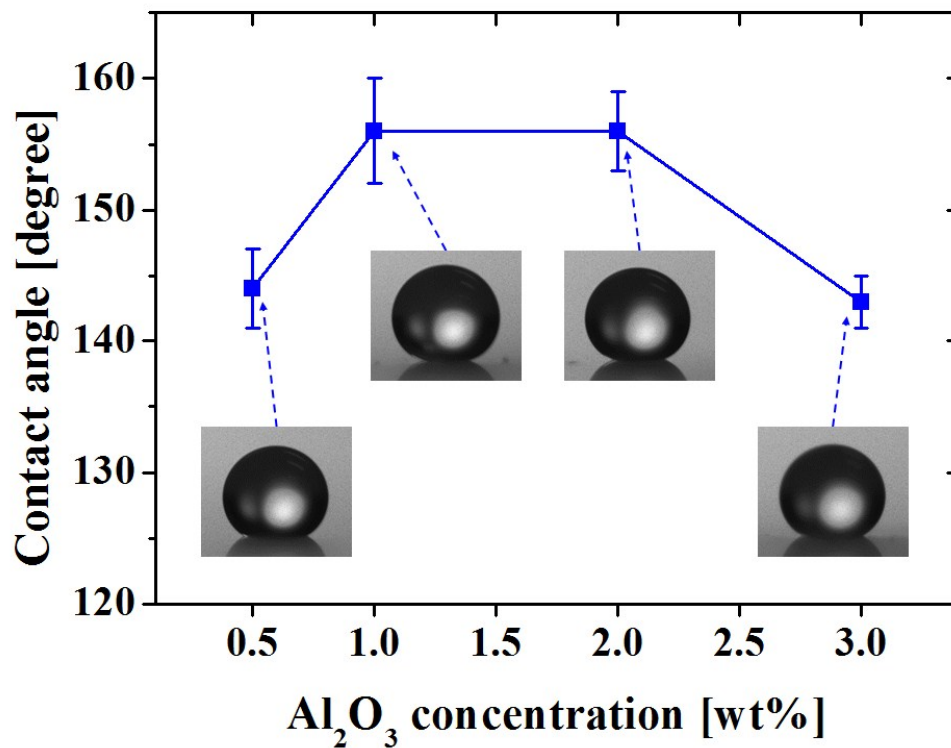

Figure S2. The static water contact angles on the organosilane-coated alumina particles prepared with different particle weight percent. The electrospaying time was fixed at 30s for all cases.

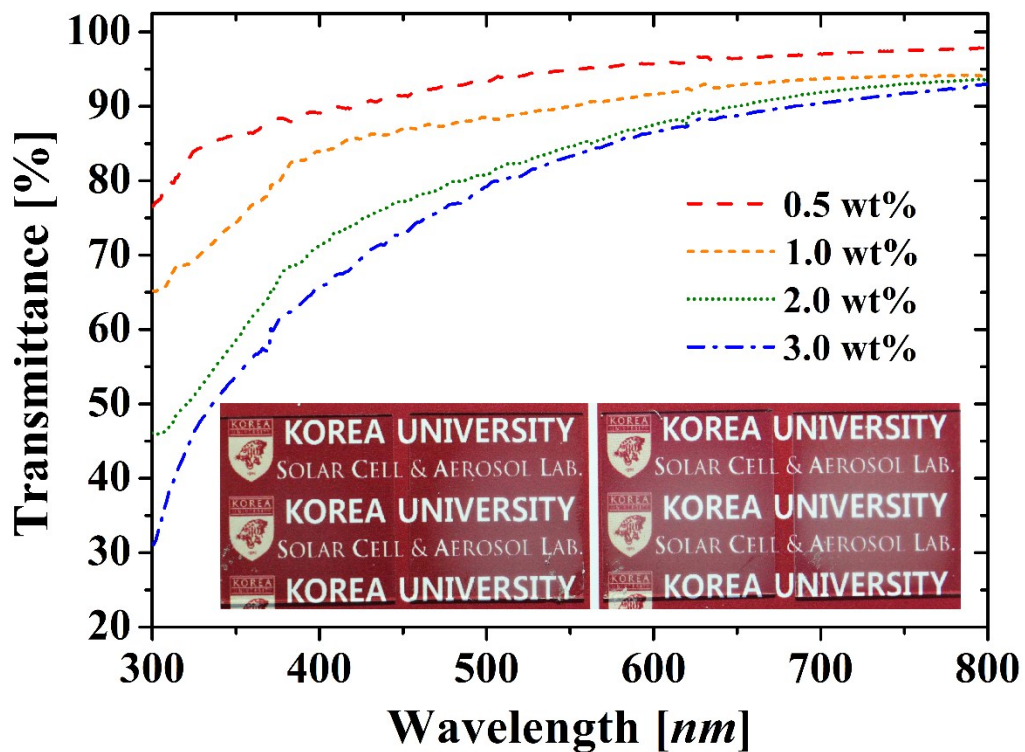

Figure S3. Optical transparency of the organosilane-alumina coatings prepared with different particle weight percent. The electrospaying time was fixed at 30s for all cases.

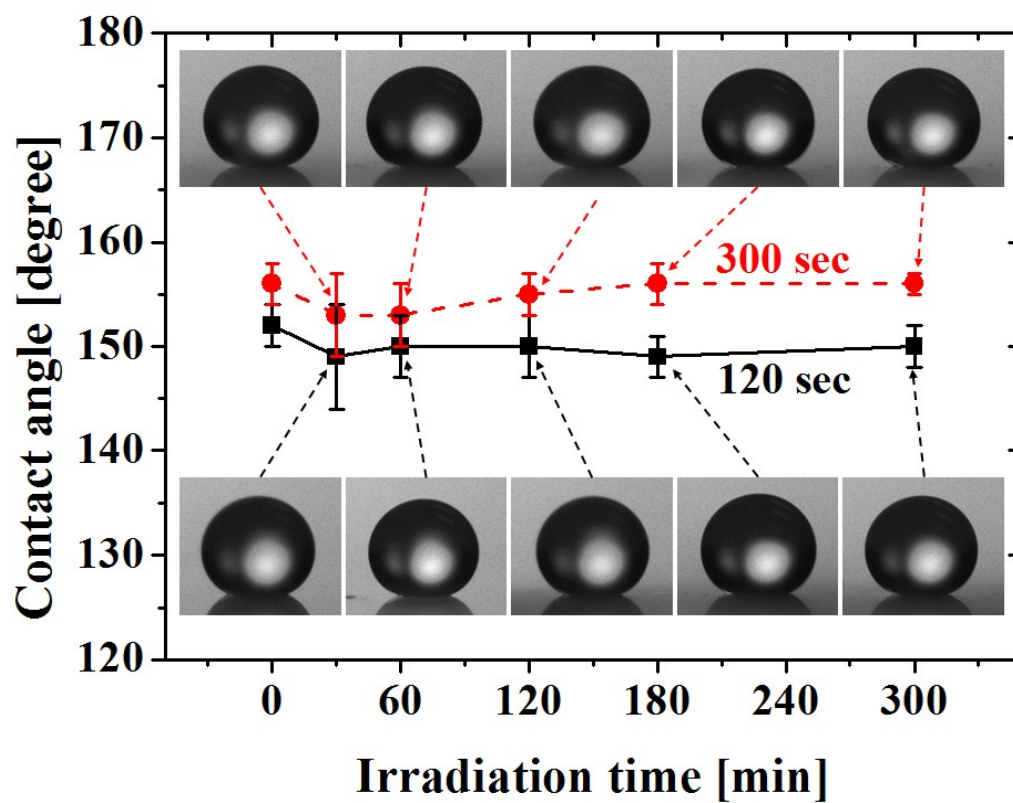

Figure S4. The static water contact angles on the organosilane-coated alumina particles prepared with different UV irradiation times.

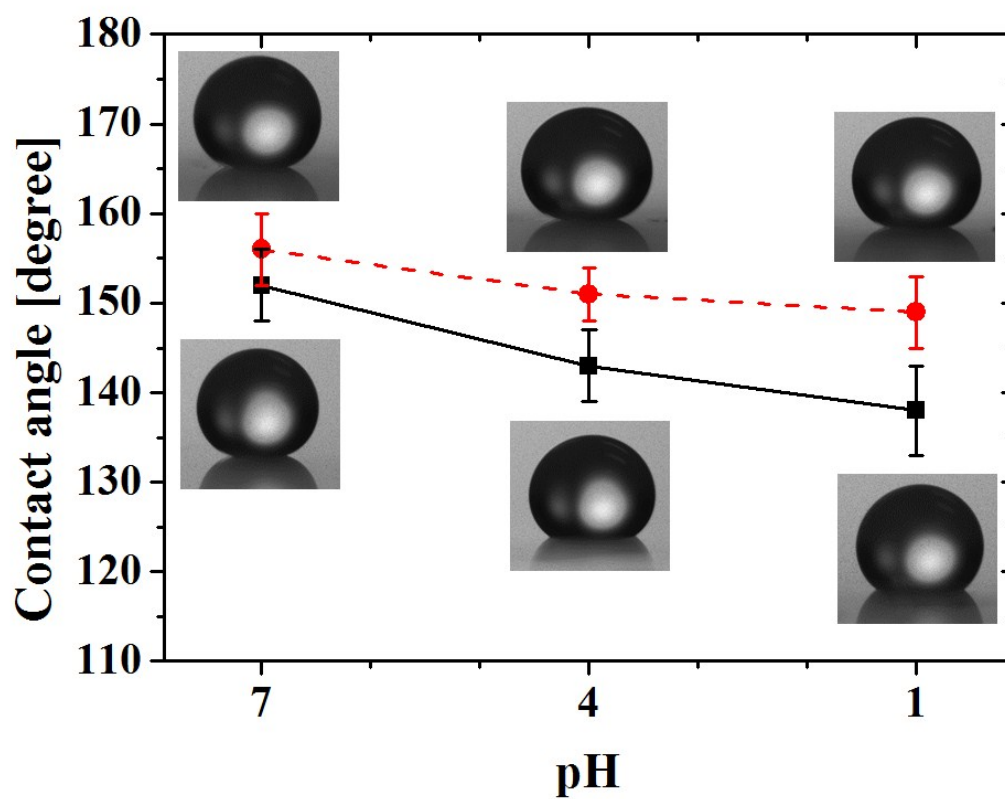

Figure S5. The static water contact angles on the organosilane-coated alumina particles prepared with different pH levels.
